# Supplementary material for: Otolith chemical fingerprints of skipjack tuna (Katsuwonus pelamis) in the Indian Ocean: First insights into stock structure delineation
Source: PLoS One. 2021 Mar 29;16(3):e0249327. doi: 10.1371/journal.pone.0249327 (PMC8006990; doi:10.1371/journal.pone.0249327)
Supplement: S1 Table — Values of trace element ratios (Ba:Ca and Sr:Ca, ppm) and stable isotopes (δ13C and δ18O, ‰) for the young-of-the-year (YOY) skipjack tuna (Katsuwonus pelamis) analysed in this study. (CSV) [file pone.0249327.s003.csv]

Reference.Code	Cohort	Region	Length_cm	Li:Ca	Sr:Ca	Ba:Ca	Mg:Ca	Mn:Ca	d13C	d18O
SKJ-AZT-NWIO-0022	2017	WCI	34.5	1.34E-06	0.003929947	2.80E-06	0.000145511	5.48E-06	NA	NA
SKJ-IRD-NWIO-0040	2017	WCI	32	1.12E-06	0.004183514	3.05E-06	9.28E-05	7.14E-06	NA	NA
SKJ-IRD-NWIO-0041	2017	WCI	35	1.64E-06	0.004747253	3.66E-06	8.20E-05	4.87E-06	-8.03	-1.14
SKJ-IRD-NWIO-0057	2017	WCI	32	9.78E-07	0.003842001	3.19E-06	0.000133016	2.83E-06	NA	NA
SKJ-IRD-NWIO-0059	2017	WCI	34	1.04E-06	0.0040218	3.51E-06	8.68E-05	9.38E-06	NA	NA
SKJ-IRD-NWIO-0062	2017	WCI	35	1.06E-06	0.004189173	2.82E-06	0.000135914	2.78E-06	NA	NA
SKJ-IRD-NWIO-0065	2017	WCI	33	1.26E-06	0.004549506	3.63E-06	0.000116598	6.82E-06	NA	NA
SKJ-IRD-NWIO-0070	2017	WCI	33	9.32E-07	0.003722339	1.98E-06	0.000103457	7.33E-06	NA	NA
SKJ-IRD-NWIO-0071	2017	WCI	33	1.24E-06	0.003574508	2.37E-06	9.52E-05	5.07E-06	NA	NA
SKJ-IRD-NWIO-0072	2017	WCI	33	1.30E-06	0.004677898	6.87E-06	8.65E-05	8.69E-06	NA	NA
SKJ-IRD-NWIO-0073	2017	WCI	32	1.10E-06	0.003826006	2.59E-06	8.69E-05	9.23E-06	NA	NA
SKJ-IRD-NWIO-0074	2017	WCI	33	9.59E-07	0.004156256	6.35E-06	0.00011367	3.33E-06	-8.06	-1.16
SKJ-IRD-NWIO-0076	2017	WCI	34	9.37E-07	0.003607867	3.35E-06	6.97E-05	7.89E-06	NA	NA
SKJ-IRD-NWIO-0078	2017	WCI	31	9.75E-07	0.003567257	2.35E-06	0.000103593	3.93E-06	NA	NA
SKJ-IRD-NWIO-0079	2017	WCI	32	1.05E-06	0.003628976	2.12E-06	0.0002618	2.72E-06	NA	NA
SKJ-IRD-SWIO-0089	2017	WCI	32	1.17E-06	0.003442368	3.24E-06	0.000117256	2.38E-06	NA	NA
SKJ-IRD-SWIO-0090	2017	WCI	32	1.01E-06	0.003739851	3.18E-06	9.45E-05	7.49E-06	-9.16	-0.88
SKJ-IRD-SWIO-0091	2017	WCI	29	1.01E-06	0.003742167	3.19E-06	9.52E-05	7.51E-06	NA	NA
SKJ-IRD-SWIO-0092	2017	WCI	30	1.30E-06	0.003974938	2.58E-06	0.000109009	1.10E-05	NA	NA
SKJ-IRD-SWIO-0094	2017	WCI	29	1.30E-06	0.004091213	3.20E-06	0.000137121	4.29E-06	-8.43	-1.47
SKJ-IRD-SWIO-0095	2017	WCI	30	1.02E-06	0.003707483	1.90E-06	0.000111224	7.03E-06	-8.51	-1.18
SKJ-IRD-SWIO-0096	2017	WCI	33	1.05E-06	0.004326966	2.88E-06	0.000135515	4.95E-06	-9.06	-1.36
SKJ-IRD-SWIO-0097	2017	WCI	31	1.31E-06	0.003840091	2.27E-06	0.000134956	5.89E-06	NA	NA
SKJ-IRD-SWIO-0098	2017	WCI	29	1.32E-06	0.004004197	4.10E-06	0.000155385	7.20E-06	NA	NA
SKJ-IRD-SWIO-0099	2017	WCI	30	1.41E-06	0.003896143	2.48E-06	9.97E-05	5.45E-06	-9.14	-1.54
SKJ-IRD-SWIO-0100	2017	WCI	31	1.39E-06	0.004145935	2.51E-06	0.000108809	7.87E-06	NA	NA
SKJ-IRD-SWIO-0101	2017	WCI	33	1.27E-06	0.004003112	3.78E-06	0.000130521	4.69E-06	NA	NA
SKJ-IRD-SWIO-124	2017	WCI	31	1.23E-06	0.003504164	1.81E-06	9.68E-05	4.16E-06	NA	NA
SKJ-AZT-NCIO-179	2017	CIM	31	1.41E-06	0.004441519	2.66E-06	0.000163084	6.58E-06	-8.38	-1.38
SKJ-AZT-NCIO-191	2017	CIM	31	9.49E-07	0.0036935	2.98E-06	0.000149881	4.84E-06	NA	NA
SKJ-AZT-NCIO-193	2017	CIM	31	1.31E-06	0.004085733	4.05E-06	0.000161727	8.29E-06	NA	NA
SKJ-AZT-NCIO-197	2017	CIM	33	1.15E-06	0.004065361	2.98E-06	0.000123636	5.63E-06	-8.97	-1.65
SKJ-AZT-NCIO-198	2017	CIM	31	1.02E-06	0.003883435	2.14E-06	0.00010511	8.51E-06	-8.82	-1.67
SKJ-AZT-NCIO-204	2017	CIM	28	1.06E-06	0.003823397	3.94E-06	0.000159531	1.06E-05	-8.63	-1.79
SKJ-AZT-NCIO-205	2017	CIM	28	1.32E-06	0.004572471	4.85E-06	0.00012233	2.62E-06	NA	NA
SKJ-AZT-NCIO-206	2017	CIM	31	1.49E-06	0.004800732	3.96E-06	0.000102449	5.91E-06	NA	NA
SKJ-AZT-NCIO-216	2017	CIM	31	1.00E-06	0.004008724	2.90E-06	0.000112699	4.79E-06	NA	NA
SKJ-AZT-NCIO-222	2017	CIM	34	8.31E-07	0.003457426	3.50E-06	9.78E-05	9.29E-06	NA	NA
SKJ-AZT-NCIO-233	2017	CIM	32	1.09E-06	0.004867652	6.59E-06	0.000100351	4.09E-06	NA	NA
SKJ-AZT-NCIO-234	2017	CIM	31	1.08E-06	0.004410858	1.24E-05	0.000108324	6.09E-06	NA	NA
SKJ-AZT-NCIO-235	2017	CIM	31	1.08E-06	0.005006196	4.24E-06	0.000147611	8.16E-06	-9.07	-1.73
SKJ-AZT-NCIO-239	2017	CIM	31	1.39E-06	0.004548412	4.16E-06	0.000148279	9.13E-06	-9.63	-1.91
SKJ-AZT-NCIO-249	2017	CIM	33	1.13E-06	0.004613836	4.47E-06	0.000137201	6.51E-06	NA	NA
SKJ-CSR-NEIO-281	2017	ECI	33.5	1.16E-06	0.004602705	7.29E-06	0.000140154	8.46E-06	-8.26	-1.58
SKJ-CSR-NEIO-283	2017	ECI	28.5	1.29E-06	0.004675451	8.23E-06	0.000135605	5.38E-06	NA	NA
SKJ-CSR-NEIO-284	2017	ECI	29.5	9.96E-07	0.004164464	3.22E-06	8.94E-05	2.62E-06	NA	NA
SKJ-CSR-NEIO-288	2017	ECI	28	9.25E-07	0.004389327	1.33E-05	0.000155311	4.33E-06	-8.16	-1.68
SKJ-CSR-NEIO-289	2017	ECI	27	1.23E-06	0.003757758	3.64E-06	0.000158728	5.88E-06	NA	NA
SKJ-CSR-NEIO-290	2017	ECI	31	1.05E-06	0.004648799	5.89E-06	0.000178022	2.65E-06	NA	NA
SKJ-CSR-NEIO-297	2017	ECI	27.5	1.52E-06	0.00501174	1.18E-05	0.000291638	1.00E-05	-8.9	-1.73
SKJ-CSR-NEIO-299	2017	ECI	27.5	1.45E-06	0.004237749	4.09E-06	0.000110463	4.37E-06	NA	NA
SKJ-CSR-NEIO-300	2017	ECI	27	1.15E-06	0.003901592	3.22E-06	0.000143877	3.83E-06	NA	NA
SKJ-CSR-NEIO-302	2017	ECI	27	1.15E-06	0.004007024	4.52E-06	0.000162557	3.50E-06	NA	NA
SKJ-CSR-NEIO-303	2017	ECI	27	1.06E-06	0.005157722	2.03E-05	0.000120422	3.32E-06	NA	NA
SKJ-CSR-NEIO-311	2017	ECI	27	1.31E-06	0.004813587	1.18E-05	0.000146145	3.16E-06	NA	NA
SKJ-CSR-NEIO-353	2017	ECI	26	1.05E-06	0.004229525	4.66E-06	0.00012237	5.43E-06	NA	NA
SKJ-CSR-NEIO-356	2017	ECI	25.5	1.37E-06	0.004431569	2.68E-06	0.000183217	7.49E-06	NA	NA
SKJ-CSR-NEIO-357	2017	ECI	26.5	1.53E-06	0.003885516	3.13E-06	0.000141048	5.31E-06	-8.48	-1.46
SKJ-CSR-NEIO-358	2017	ECI	26	1.19E-06	0.003924547	5.07E-06	0.000111317	6.80E-06	NA	NA
SKJ-CSR-NEIO-359	2017	ECI	25	9.29E-07	0.003630374	6.09E-06	0.000113395	8.38E-06	-9.13	-1.86
SKJ-CSR-NEIO-364	2017	ECI	26	1.23E-06	0.003902421	2.52E-06	0.000109176	2.91E-06	NA	NA
SKJ-CSR-NEIO-365	2017	ECI	26.5	1.06E-06	0.00388519	3.35E-06	0.00012238	5.98E-06	NA	NA
SKJ-AZT-NWIO-495	2018	WCI	33	8.76E-07	0.003687344	3.58E-06	0.0002148	7.89E-06	-8.9	-0.99
SKJ-AZT-NWIO-497	2018	WCI	31	1.01E-06	0.003856116	2.60E-06	0.000108223	4.97E-06	NA	NA
SKJ-AZT-NWIO-505	2018	WCI	29.5	1.04E-06	0.004082118	6.16E-06	0.000105612	7.40E-06	NA	NA
SKJ-AZT-NWIO-511	2018	WCI	31	1.46E-06	0.003959775	1.33E-05	0.000112324	4.16E-06	NA	NA
SKJ-AZT-NWIO-516	2018	WCI	33	1.18E-06	0.00413083	4.53E-06	0.000137944	4.55E-06	-8.24	-1.18
SKJ-AZT-NWIO-517	2018	WCI	32	1.22E-06	0.004223044	4.59E-06	0.000139923	9.02E-06	NA	NA
SKJ-AZT-NWIO-519	2018	WCI	32	1.34E-06	0.004004871	3.11E-06	0.000149207	6.90E-06	-8.35	-1.53
SKJ-AZT-NWIO-521	2018	WCI	29	1.20E-06	0.003831397	3.82E-06	0.000135285	4.31E-06	NA	NA
SKJ-AZT-NWIO-522	2018	WCI	32	1.36E-06	0.003852318	4.01E-06	0.000135545	3.53E-06	-8.62	-1
SKJ-AZT-NWIO-523	2018	WCI	30	1.13E-06	0.005051071	5.16E-06	0.000142796	4.71E-06	-8.88	-1.48
SKJ-AZT-NWIO-532	2018	WCI	32.5	9.71E-07	0.003670582	2.04E-06	0.000192946	5.42E-06	-8.91	-1.17
SKJ-AZT-NWIO-533	2018	WCI	33	9.66E-07	0.004196896	3.07E-06	0.000166107	3.52E-06	NA	NA
SKJ-AZT-NWIO-568	2018	WCI	33	4.83E-07	0.003721577	4.01E-06	0.000172774	5.91E-06	NA	NA
SKJ-AZT-NWIO-572	2018	WCI	30.5	1.08E-06	0.00475767	2.67E-06	0.000116965	6.09E-06	NA	NA
SKJ-AZT-NWIO-573	2018	WCI	33	1.32E-06	0.004830981	3.95E-06	0.00013023	6.96E-06	-9.27	-1.59
SKJ-AZT-NWIO-575	2018	WCI	32	1.14E-06	0.005049584	5.15E-06	8.85E-05	6.42E-06	NA	NA
SKJ-IRD-NWIO-0077	2017	WCI	32	1.50E-06	0.003240316	2.01E-06	0.000118663	4.35E-06	-8.5	-1.55
SKJ-AZT-NWIO-492	2018	WCI	29	1.23E-06	0.00380389	3.12E-06	0.000121934	2.49E-06	NA	NA
SKJ-AZT-NWIO-506	2018	WCI	33	1.68E-06	0.004985942	4.81E-06	0.000153362	9.52E-06	-9.11	-1.54
SKJ-AZT-NWIO-536	2018	WCI	32.5	9.66E-07	0.004648522	3.21E-06	0.000144997	3.92E-06	-9.23	-1.6
SKJ-AZT-NCIO-655	2018	CIM	31.5	1.43E-06	0.004156086	1.38E-05	0.000119856	1.31E-05	-8.35	-1.61
SKJ-AZT-NWIO-542	2018	WCI	30.5	1.43E-06	0.004077051	2.56E-06	0.000161076	8.76E-06	-8.44	-1.27
SKJ-AZT-NWIO-545	2018	WCI	31.5	1.29E-06	0.004513234	2.73E-06	0.000141589	3.28E-06	-8.84	-1.72
SKJ-AZT-NCIO-580	2018	CIM	29	1.24E-06	0.004972132	1.76E-05	0.000124105	8.82E-06	-8.28	-1.39
SKJ-AZT-NCIO-582	2018	CIM	30.5	1.46E-06	0.00517647	1.79E-05	0.000126011	9.41E-06	-8.72	-1.64
SKJ-AZT-NCIO-614	2018	CIM	29	1.04E-06	0.003509651	1.67E-06	0.000109404	2.43E-06	-8.07	-1.41
SKJ-AZT-NCIO-158	2017	CIM	30	7.87E-07	0.00394585	2.50E-06	0.000119983	6.48E-06	-8.74	-1.84
SKJ-AZT-NCIO-170	2017	CIM	30	1.49E-06	0.003997246	2.02E-06	0.000140874	4.92E-06	NA	NA
SKJ-AZT-NCIO-172	2017	CIM	29	1.06E-06	0.004049527	2.28E-06	0.000166135	6.19E-06	NA	NA
SKJ-AZT-NCIO-577	2018	CIM	28.5	1.33E-06	0.004131131	3.16E-06	0.000127277	3.56E-06	-9.13	-1.88
SKJ-AZT-NCIO-583	2018	CIM	28.5	1.16E-06	0.004642061	2.92E-06	0.000109487	1.55E-06	NA	NA
SKJ-AZT-NCIO-615	2018	CIM	31	1.19E-06	0.004265965	1.31E-05	0.00011672	7.87E-06	-8.1	-1.45
SKJ-AZT-NCIO-603	2018	CIM	30	1.11E-06	0.003957985	3.02E-06	8.16E-05	1.08E-06	NA	NA
SKJ-AZT-NCIO-606	2018	CIM	31	9.86E-07	0.005044565	1.82E-05	9.71E-05	8.52E-06	-7.77	-1.57
SKJ-AZT-NCIO-609	2018	CIM	30	7.21E-07	0.004186923	2.56E-06	0.000101272	9.88E-06	-9.49	-1.56
SKJ-AZT-NCIO-610	2018	CIM	30	9.61E-07	0.005300872	2.84E-06	9.38E-05	4.40E-06	NA	NA
SKJ-AZT-NCIO-623	2018	CIM	33	1.18E-06	0.004868387	4.22E-06	0.000121361	1.36E-05	NA	NA
SKJ-AZT-NCIO-651	2018	CIM	31	9.37E-07	0.004575581	3.44E-06	0.000109709	5.92E-06	NA	NA
SKJ-AZT-NCIO-657	2018	CIM	30	1.58E-06	0.00538989	5.36E-06	0.000138529	1.13E-05	-8.75	-1.14
SKJ-AZT-NCIO-662	2018	CIM	30.5	1.45E-06	0.003933958	2.28E-06	0.000178728	4.44E-06	NA	NA
SKJ-AZT-NCIO-621	2018	CIM	31	1.34E-06	0.004265509	3.03E-06	0.000143924	8.84E-06	-9.75	-2.09
SKJ-CSR-NEIO-474	2018	ECI	31	6.11E-07	0.005297846	6.30E-06	9.04E-05	1.95E-06	NA	NA
SKJ-AZT-NCIO-652	2018	CIM	31.5	8.99E-07	0.003977161	2.87E-06	0.000106562	1.13E-05	-8.37	-1.38
SKJ-AZT-NCIO-654	2018	CIM	32.5	1.31E-06	0.005646181	8.20E-06	0.000179739	1.05E-05	NA	NA
SKJ-CSR-NEIO-295	2017	ECI	26.5	8.16E-07	0.004323852	5.86E-06	0.000155435	3.68E-06	-8.88	-1.36
SKJ-CSR-NEIO-380	2018	ECI	31.5	1.22E-06	0.00374812	4.60E-06	0.000138403	1.43E-05	-9.38	-1.84
SKJ-CSR-NEIO-381	2018	ECI	29	1.15E-06	0.004082704	3.10E-06	9.18E-05	8.21E-06	-8.45	-1.56
SKJ-CSR-NEIO-403	2018	ECI	29.5	8.83E-07	0.003661248	5.53E-06	0.00011845	1.02E-05	NA	NA
SKJ-CSR-NEIO-448	2018	ECI	29.5	1.13E-06	0.003305183	1.91E-06	0.000212189	8.21E-06	-8.71	-2
SKJ-CSR-NEIO-463	2018	ECI	24.5	1.40E-06	0.003495851	1.71E-06	0.000132396	5.20E-06	-9.59	-1.93
SKJ-CSR-NEIO-378	2018	ECI	31	1.50E-06	0.006180387	6.17E-06	0.000126323	6.72E-06	NA	NA
SKJ-CSR-NEIO-475	2018	ECI	34	1.01E-06	0.004029542	3.68E-06	0.000128879	9.22E-06	NA	NA
SKJ-CSR-NEIO-382	2018	ECI	29	1.19E-06	0.005208098	3.55E-06	9.26E-05	4.07E-06	-8.4	-1.79
SKJ-CSR-NEIO-383	2018	ECI	35	1.42E-06	0.004512688	3.37E-06	0.000113087	7.42E-06	-8.63	-2.05
SKJ-CSR-NEIO-385	2018	ECI	29	1.19E-06	0.003156635	3.37E-06	0.000123699	7.39E-06	NA	NA
SKJ-CSR-NEIO-408	2018	ECI	34.5	1.15E-06	0.003627015	2.97E-06	0.000136228	1.87E-05	-8.73	-1.99
SKJ-CSR-NEIO-409	2018	ECI	30.5	1.04E-06	0.00525674	3.78E-06	0.000142387	4.60E-06	-8.97	-1.92
SKJ-CSR-NEIO-412	2018	ECI	29.5	9.49E-07	0.004154943	3.91E-06	0.000125254	8.81E-06	NA	NA
SKJ-CSR-NEIO-466	2018	ECI	31	1.51E-06	0.003666609	2.20E-06	0.000117167	1.26E-05	-9.06	-1.99
SKJ-CSR-NEIO-473	2018	ECI	30	1.02E-06	0.004261519	3.48E-06	0.000115943	7.42E-06	-9.47	-2
SKJ-CSR-NEIO-376	2018	ECI	29	7.90E-07	0.004835767	4.55E-06	0.000264527	2.38E-06	-8.48	-1.66
SKJ-CSR-NEIO-411	2018	ECI	28.5	9.99E-07	0.004332051	5.53E-06	0.000176957	7.56E-06	NA	NA
SKJ-CSR-NEIO-460	2018	ECI	28	1.25E-06	0.004567525	6.35E-06	0.000119274	8.51E-06	-8.71	-1.65
SKJ-CSR-NEIO-465	2018	ECI	34.5	1.11E-06	0.003930268	1.22E-05	0.00012891	1.22E-05	NA	NA
SKJ-CSR-NEIO-472	2018	ECI	32	1.12E-06	0.004166105	1.02E-05	0.000126342	4.85E-06	NA	NA
SKJ-IRD-NWIO-0069	2017	WCI	33	1.19E-06	0.003747467	3.44E-06	0.000130709	9.15E-06	-9.15	-1.69
